# Supplementary material
Source: Springer Nature journal article supplement (https://www.springermedizin.de/resource/supplementary/12968_2012_3287_MOESM4_ESM.pdf/9583552)

(a)

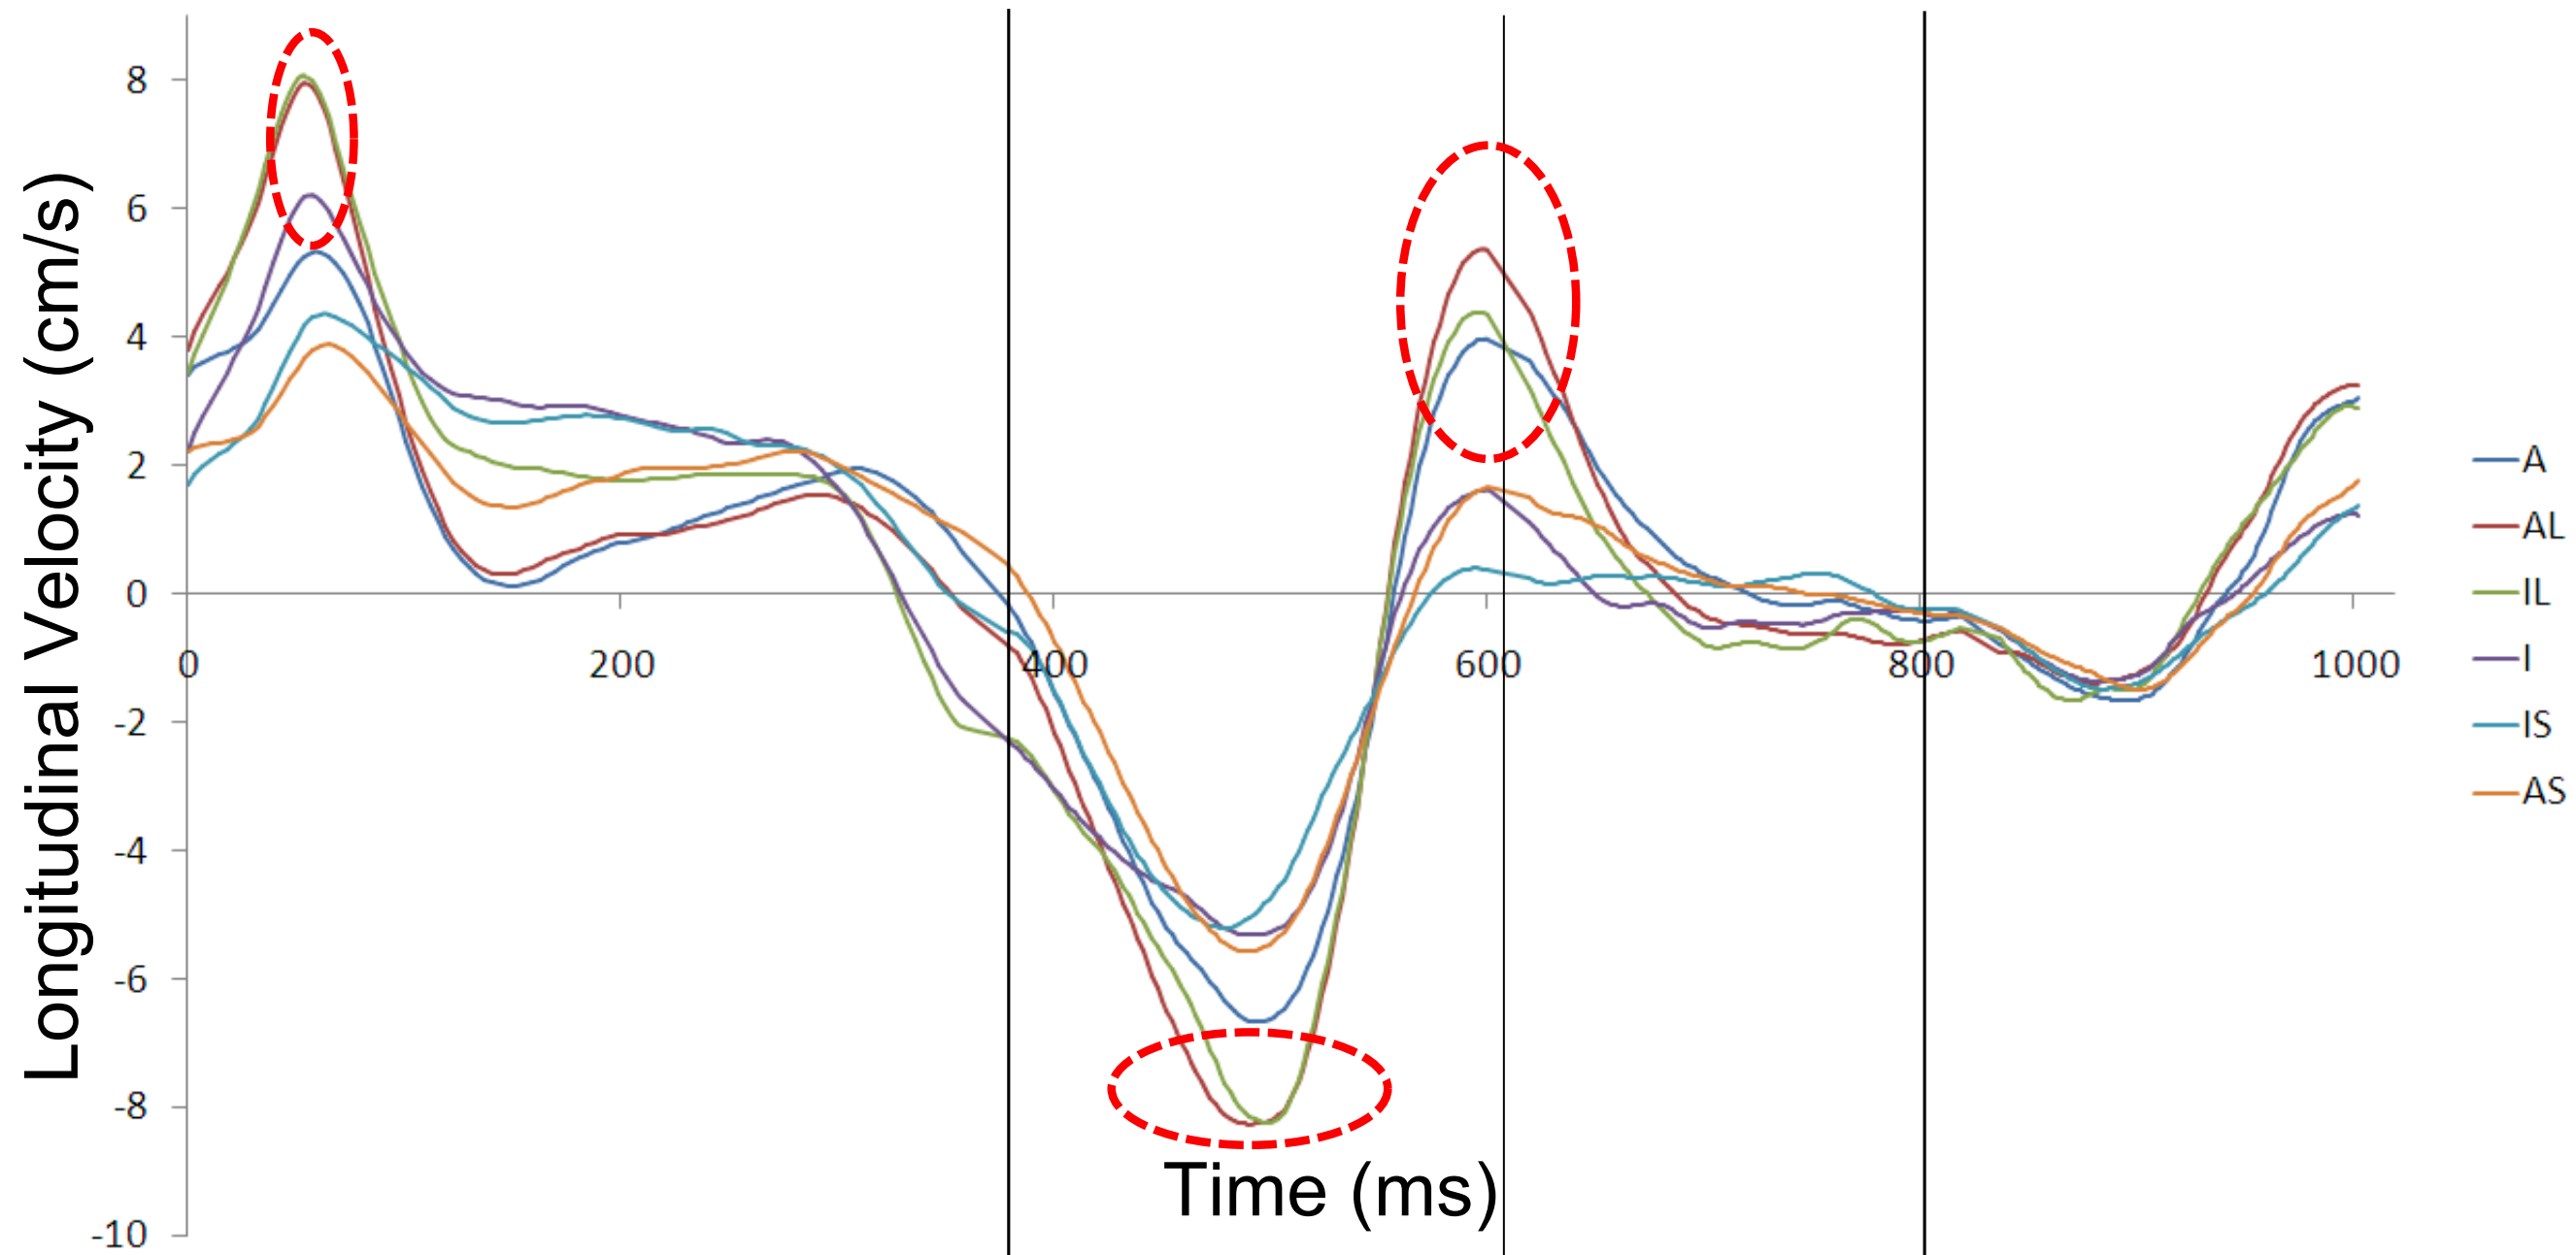

(b)

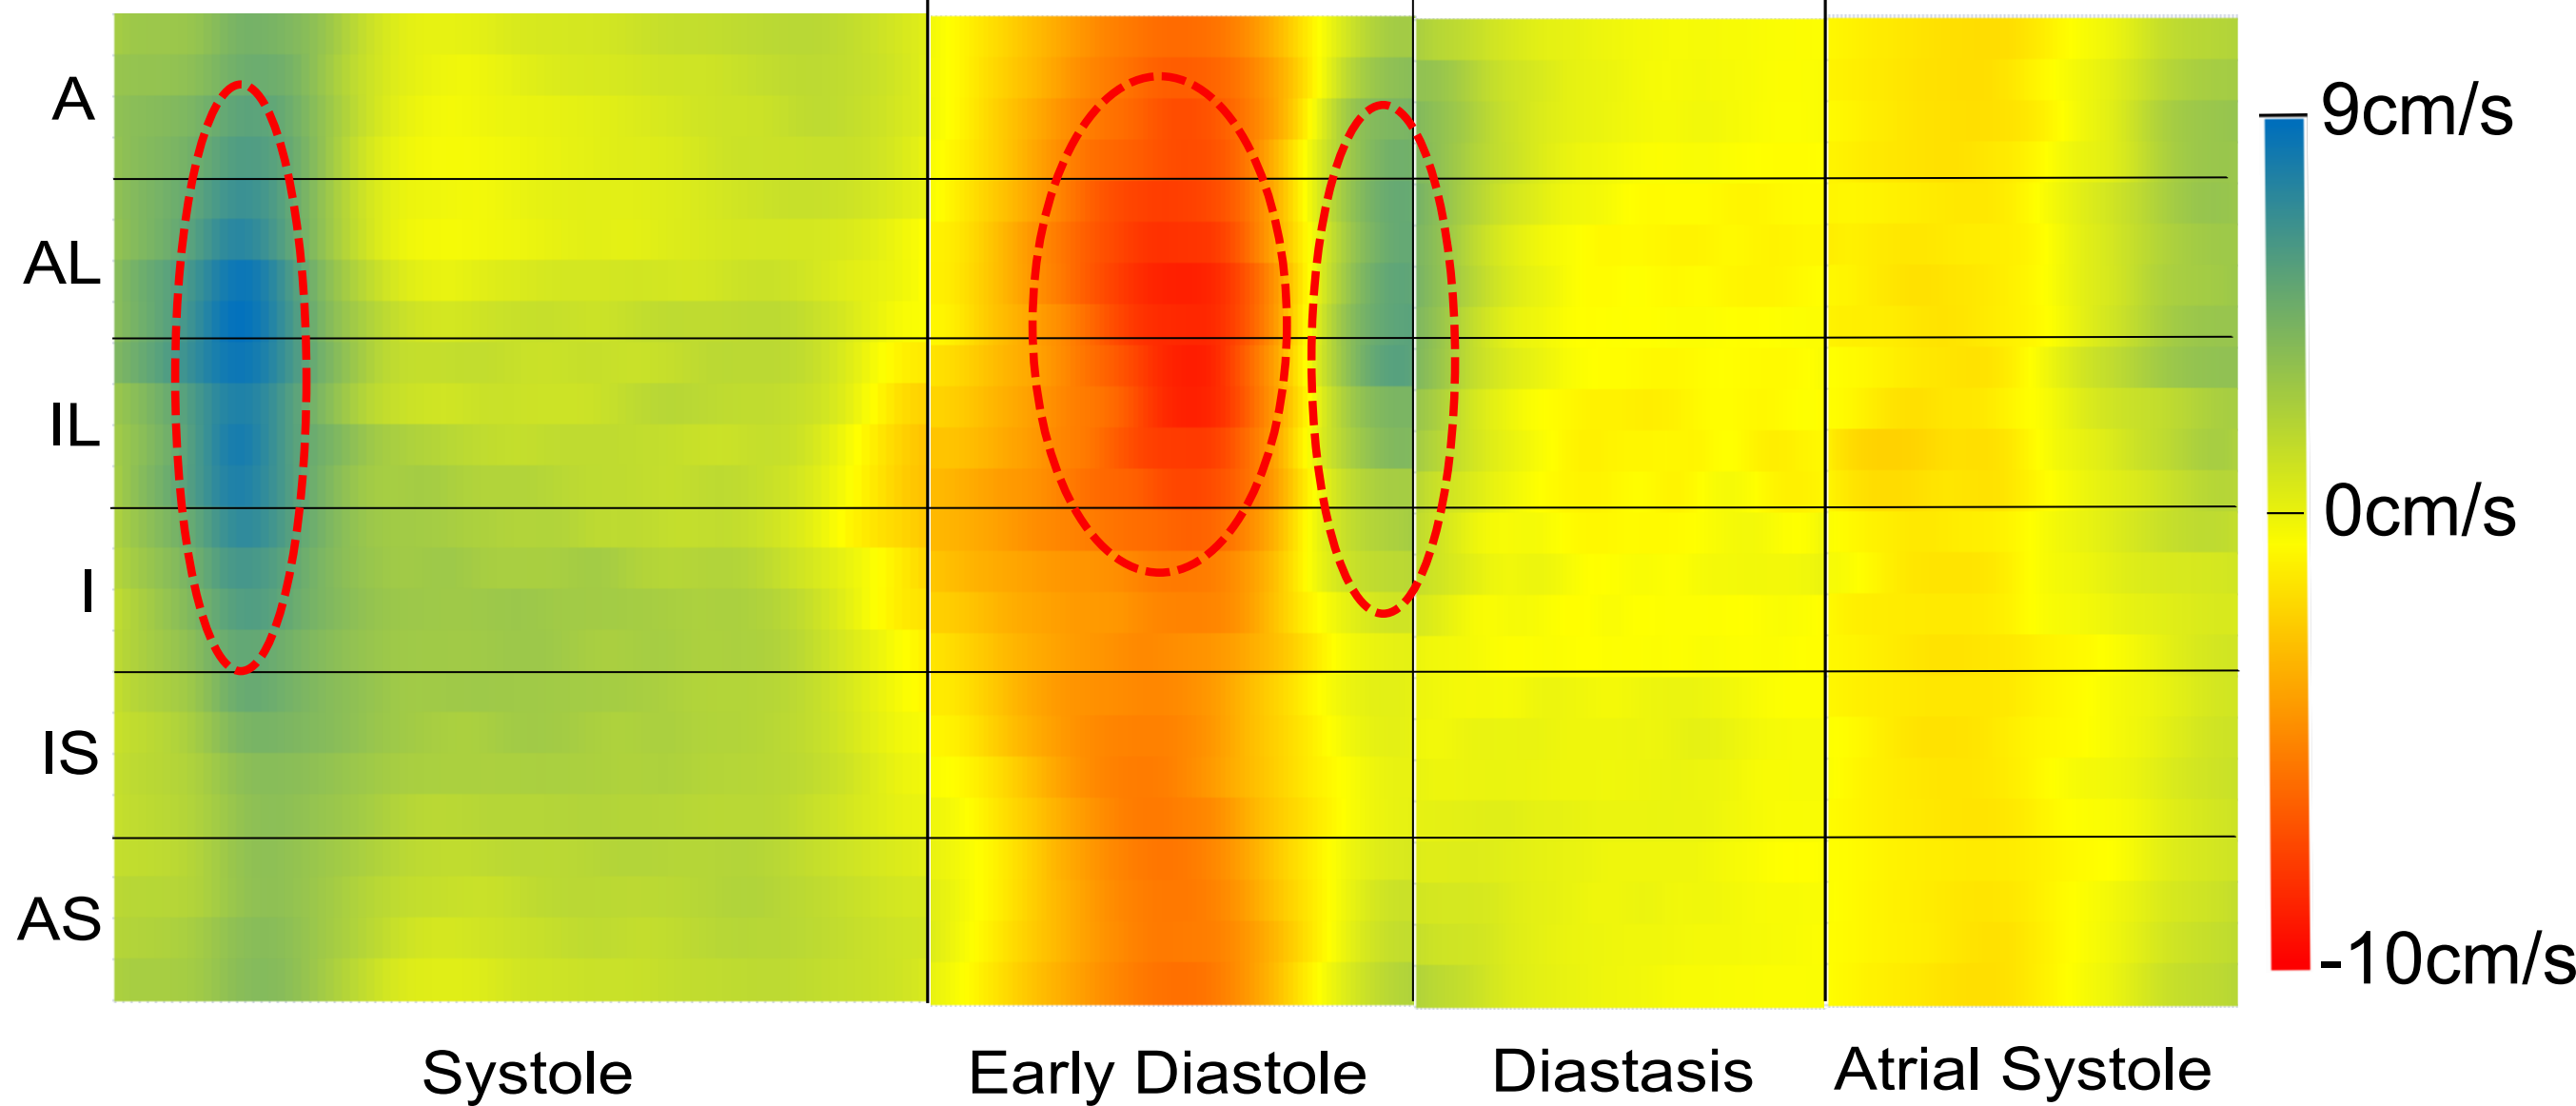

Supplement: MOESM4 [file 9583552]
